# Supplementary material for: Structure and Energetics of Ligand–Fluorine Interactions with Galectin‐3 Backbone and Side‐Chain Amides: Insight into Solvation Effects and Multipolar Interactions
Source: PubMed Central journal article supplement — ChemMedChem. 2019 Jul 11;14(16):1528–36. doi: 10.1002/cmdc.201900293 (PMC6772088; doi:10.1002/cmdc.201900293), 2019-07-11
Supplement: CMDC-14-1528-s001.pdf [file CMDC-14-1528-s001.pdf]

## Supporting Information

### **Structure and Energetics of Ligand–Fluorine Interactions with Galectin-3 Backbone and Side-Chain Amides: Insight into Solvation Effects and Multipolar Interactions**

Rohit Kumar<sup>+, [a]</sup> Majda Misini Ignjatović<sup>+, [b]</sup> Kristoffer Peterson,<sup>[c]</sup> Martin Olsson,<sup>[b]</sup>  
Hakon Leffler,<sup>[d]</sup> Ulf Ryde,<sup>[b]</sup> Ulf J. Nilsson,<sup>[c]</sup> and Derek T. Logan<sup>\*[a]</sup>

cmdc\_201900293\_sm\_miscellaneous\_information.pdf

## Table of Contents

|       |                                                                       |
|-------|-----------------------------------------------------------------------|
| S2    | Figure S1: NMR spectrum of compound <b>9</b>                          |
| S3    | Fig. S2: Electron density maps for all ligands                        |
| S4-S5 | Table S1: Data processing and refinement statistics for all complexes |

**Figure S1: NMR spectrum of 3'-deoxy-3'-(4-phenyl-1*H*-1,2,3-triazol-1-yl)- $\beta$ -D-galactopyranosyl 1-thio- $\beta$ -D-glucopyranoside 9**

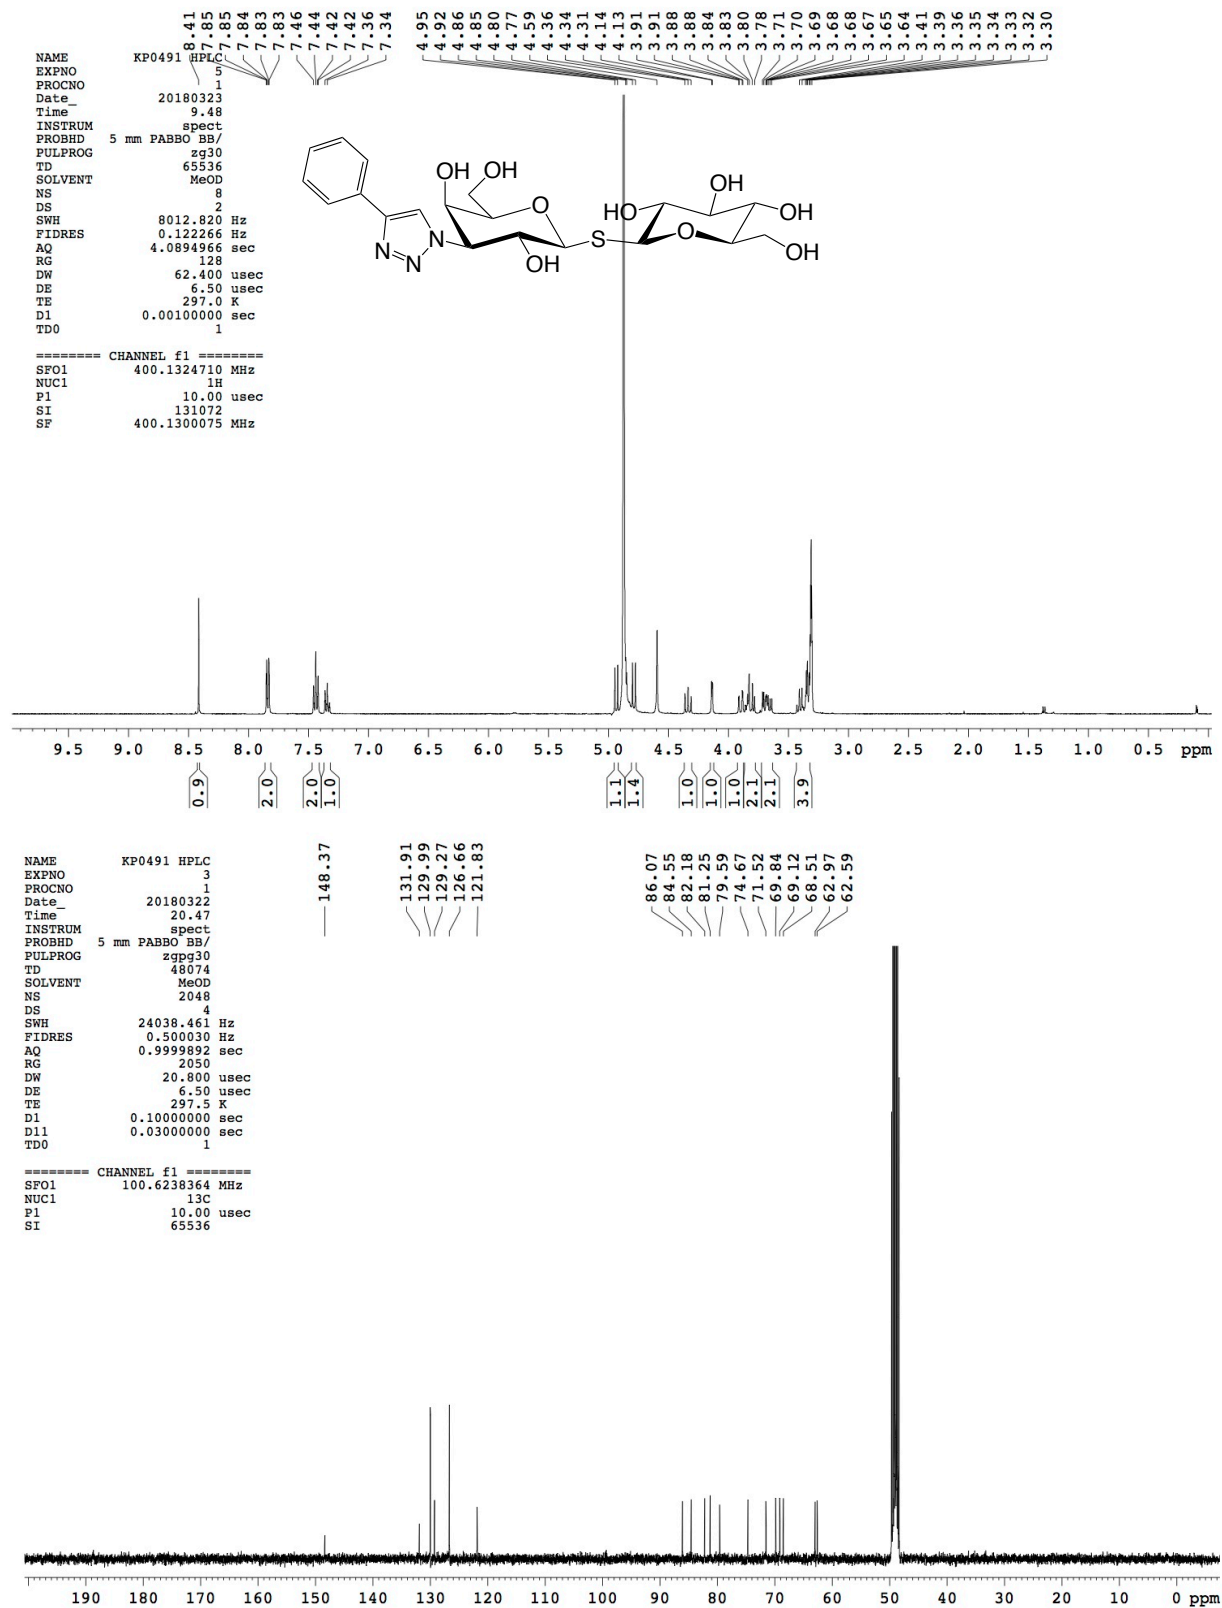

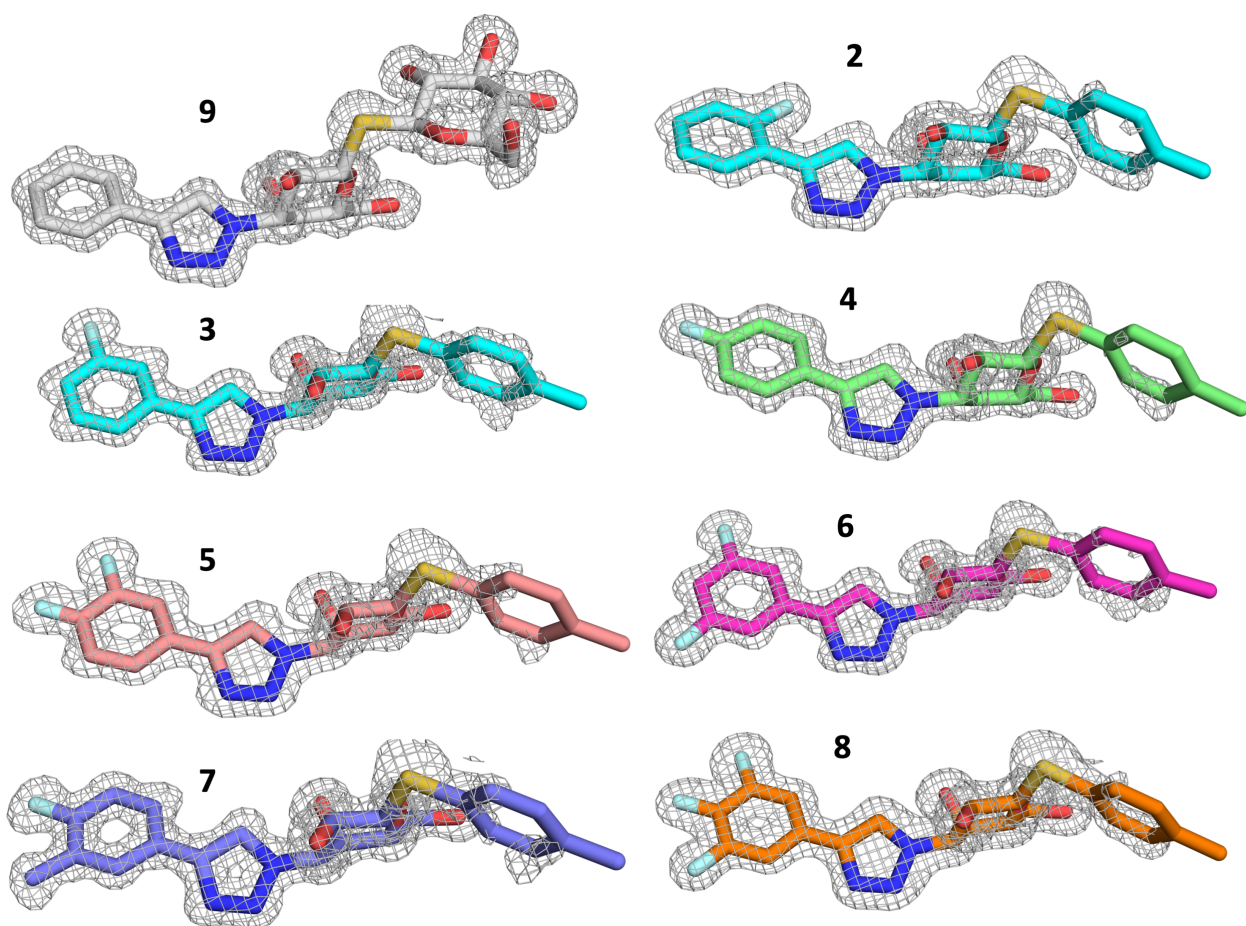

**Figure S2:** View of the ligands depicting their electron densities. The  $2m|F_o|-D|F_c|$  electron density maps are contoured at  $1.0 \sigma$  above the mean.

**Table S1.** Data processing and refinement statistics for the X-ray crystal structures.

Values in parentheses are for the highest resolution shell, unless noted otherwise.

| <i>compound</i>                                                                   | <b>2</b>                                       | <b>3</b>                                      | <b>4</b>                                       | <b>5</b>                                       |
|-----------------------------------------------------------------------------------|------------------------------------------------|-----------------------------------------------|------------------------------------------------|------------------------------------------------|
| <b>PDB code</b>                                                                   | 6QLT                                           | 6QLN                                          | 6QLQ                                           | 6QLO                                           |
| <b>station</b>                                                                    | I911-3                                         | I911-3                                        | I911-3                                         | I911-3                                         |
| <b>wavelength [Å]</b>                                                             | 0.9500                                         | 0.9500                                        | 0.9500                                         | 1.000                                          |
| <b>unit cell (Å)</b>                                                              | a = 35.83<br>b = 57.44<br>c = 63.07            | a = 36.91<br>b = 57.78<br>c = 62.78           | a = 36.12<br>b = 57.48<br>c = 62.66            | a = 36.39<br>b = 57.79<br>c = 62.85            |
| <b>space group</b>                                                                | P2 <sub>1</sub> 2 <sub>1</sub> 2 <sub>1</sub>  | P2 <sub>1</sub> 2 <sub>1</sub> 2 <sub>1</sub> | P2 <sub>1</sub> 2 <sub>1</sub> 2 <sub>1</sub>  | P2 <sub>1</sub> 2 <sub>1</sub> 2 <sub>1</sub>  |
| <b>resolution range [Å]</b>                                                       | 27.65 - 1.15<br>(1.191 - 1.15)                 | 27.59 - 1.0<br>(1.03 - 1.0)                   | 27.51 - 1.079<br>(1.11 - 1.079)                | 30.79 - 1.18<br>(1.22 - 1.18)                  |
| <b>completeness [%]</b>                                                           | 99.9 (99.9)                                    | 95.1 (91.9)                                   | 99.45 (95.8)                                   | 95.9 (92.1)                                    |
| <b>Total reflections<br/>unique reflections</b>                                   | 278763 (26937)<br>46962 (4628)                 | 418166 (39754)<br>69629 (6621)                | 331055 (30957)<br>56658 (5501)                 | 257295(22594)<br>42509 (4033)                  |
| <b>CC1/2</b>                                                                      | 0.999 (0.359)                                  | 0.999 (0.752)                                 | 0.999 (0.173)                                  | 1 (0.768)                                      |
| <b>multiplicity</b>                                                               | 5.9 (5.8)                                      | 6.0 (6.0)                                     | 5.8 (5.6)                                      | 6.1 (5.6)                                      |
| <b>R<sub>merge</sub> [%]</b>                                                      | 0.101 (1.8)                                    | 0.0602(0.8111)                                | 0.115 (2.43)                                   | 0.0507(0.848)                                  |
| <b>mean I/σ(I)</b>                                                                | 13.4 (1.0)                                     | 17.4 (2.1)                                    | 10.2 (0.6)                                     | 21.4 (2.2)                                     |
| <b>Wilson B [Å<sup>2</sup>]</b>                                                   | 10.11                                          | 7.32                                          | 9.55                                           | 10.27                                          |
| <b>refinement program</b>                                                         | phenix.refine                                  | phenix.refine                                 | phenix.refine                                  | phenix.refine                                  |
| <b>R<sub>model</sub> (F) [%]</b>                                                  | 0.149 (0.303)                                  | 0.124 (0.217)                                 | 0.154 (0.357)                                  | 0.133 (0.218)                                  |
| <b>R<sub>free</sub> (F) [%]</b>                                                   | 0.170 (0.318)                                  | 0.141 (0.232)                                 | 0.182 (0.379)                                  | 0.154 (0.248)                                  |
| <b>reflections used in<br/>refinement<br/>(for R<sub>free</sub>)</b>              | 46961 (4628)<br>2280 (227)                     | 69628 (6622)<br>3541 (316)                    | 56502 (5353)<br>2907 (245)                     | 42508 (4034)<br>2137 (196)                     |
| <b>average B-factors<br/>[Å<sup>2</sup>]</b>                                      | protein: 12.2<br>ligand: 19.9<br>solvent: 25.7 | protein: 8.4<br>ligand: 11.9<br>solvent: 24.9 | protein: 12.3<br>ligand: 23.0<br>solvent: 26.8 | protein: 12.2<br>ligand: 17.9<br>solvent: 26.3 |
| <b>Ramachandran<br/>outliers [%]</b>                                              | 0.0                                            | 0.0                                           | 0.0                                            | 0.0                                            |
| <b>rotamer outliers [%]<br/>MolProbity clash<br/>score</b>                        | 0.74<br>2.92                                   | 1.42<br>1.21                                  | 0.00<br>1.26                                   | 0.0<br>1.68                                    |
| <b>bond length rmsd<br/>from ideal [Å]<br/>bond angle rmsd<br/>from ideal [°]</b> | 0.014<br>1.59                                  | 0.012<br>1.71                                 | 0.006<br>0.97                                  | 0.009<br>1.09                                  |

| <b>compound</b>                                                                   | <b>6</b>                                      | <b>7</b>                                      | <b>8</b>                                       | <b>9</b>                                       |
|-----------------------------------------------------------------------------------|-----------------------------------------------|-----------------------------------------------|------------------------------------------------|------------------------------------------------|
| <b>PDB code</b>                                                                   | 6QLR                                          | 6QLU                                          | 6QLP                                           | 6QLS                                           |
| <b>station</b>                                                                    | I911-3                                        | I911-3                                        | ID23-1                                         | BioMAX                                         |
| <b>wavelength [Å]</b>                                                             | 1.0000                                        | 0.9500                                        | 0.9762                                         | 0.635784                                       |
| <b>unit cell (Å)</b>                                                              | a = 36.77<br>b = 57.82<br>c = 62.70           | a = 36.90<br>b = 57.68<br>c = 62.89           | a = 35.78<br>b = 57.27<br>c = 62.61            | a = 36.48<br>b = 58.66<br>c = 63.12            |
| <b>space group</b>                                                                | P2 <sub>1</sub> 2 <sub>1</sub> 2 <sub>1</sub> | P2 <sub>1</sub> 2 <sub>1</sub> 2 <sub>1</sub> | P2 <sub>1</sub> 2 <sub>1</sub> 2 <sub>1</sub>  | P2 <sub>1</sub> 2 <sub>1</sub> 2 <sub>1</sub>  |
| <b>resolution range [Å]</b>                                                       | 31.4 - 0.97<br>(1.00 - 0.97)                  | 27.6 - 1.1<br>(1.14 - 1.1)                    | 31.1 - 1.08<br>(1.12 - 1.08)                   | 22.1 - 1.04<br>1.08 - 1.04                     |
| <b>completeness [%]</b>                                                           | 98.4 (88.0)                                   | 99.5 (96.0)                                   | 99.5 (98.2)                                    | 99.4 (96.3)                                    |
| <b>Total reflections<br/>unique reflections</b>                                   | 341914 (23765)<br>78756 (7095)                | 315434 (20465)<br>55014 (5249)                | 264147 (23854)<br>55562 (5440)                 | 422720 (39340)<br>64101 (6158)                 |
| <b>CC1/2</b>                                                                      | 0.999 (0.320)                                 | 1.000 (0.850)                                 | 1.000 (0.210)                                  | 0.999 (0.470)                                  |
| <b>multiplicity</b>                                                               | 4.3 (3.4)                                     | 5.7 (3.9)                                     | 4.8 (4.4)                                      | 6.6 (6.4)                                      |
| <b>R<sub>merge</sub> [%]</b>                                                      | 0.058 (1.42)                                  | 0.048 (0.437)                                 | 0.056 (1.850)                                  | 0.091 (1.210)                                  |
| <b>mean I/σ(I)</b>                                                                | 13.8 (0.8)                                    | 22.3 (2.8)                                    | 12.2 (0.7)                                     | 9.0 (1.0)                                      |
| <b>Wilson B-factor [Å<sup>2</sup>]</b>                                            | 7.83                                          | 7.30                                          | 13.21                                          | 10.20                                          |
| <b>refinement program</b>                                                         | phenix.refine                                 | phenix.refine                                 | phenix.refine                                  | phenix.refine                                  |
| <b>R<sub>model</sub> (F) [%]</b>                                                  | 0.137 (0.370)                                 | 0.123 (0.196)                                 | 0.153 (0.353)                                  | 0.136 (0.266)                                  |
| <b>R<sub>free</sub> (F) [%]</b>                                                   | 0.156 (0.375)                                 | 0.149 (0.208)                                 | 0.171 (0.391)                                  | 0.159 (0.285)                                  |
| <b>reflections used in<br/>refinement<br/>(for R<sub>free</sub>)</b>              | 78560 (6913)<br><br>3933 (316)                | 55009 (5245)<br><br>2728 (275)                | 55521 (5408)<br><br>2708 (281)                 | 63976 (6104)<br><br>3303 (294)                 |
| <b>average B-factors<br/>[Å<sup>2</sup>]</b>                                      | protein: 9.5<br>ligand: 17.9<br>solvent: 25.2 | protein: 8.5<br>ligand: 13.5<br>solvent: 22.4 | protein: 18.1<br>ligand: 23.1<br>solvent: 28.3 | protein: 11.5<br>ligand: 12.3<br>solvent: 27.7 |
| <b>Ramachandran<br/>outliers [%]</b>                                              | 0.0                                           | 0.0                                           | 0.0                                            | 0.0                                            |
| <b>rotamer outliers [%]<br/>MolProbity clash<br/>score</b>                        | 0.0<br>2.06                                   | 0.00<br>1.28                                  | 0.74<br>2.90                                   | 0.0<br>2.80                                    |
| <b>bond length rmsd<br/>from ideal [Å]<br/>bond angle rmsd<br/>from ideal [°]</b> | 0.008<br><br>1.07                             | 0.009<br><br>1.15                             | 0.014<br><br>1.56                              | 0.011<br><br>1.24                              |
